# Supplementary material
Source: PubMed Central journal article supplement (PMC2775144)
Supplement: NIHMS140834-supplement-1_si_001.pdf [file NIHMS140834-supplement-1_si_001.pdf]

0.15 E 10

DHQ37b-5 Sm (Mn, 2x3)

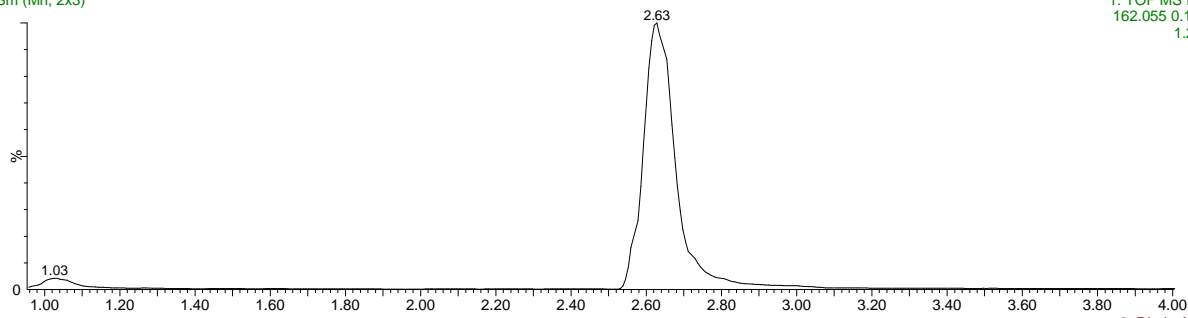

11-May-2009

3::0::0

1: TOF MS ES+  
162.055 0.10Da  
1.20e3

DHQ37b-5

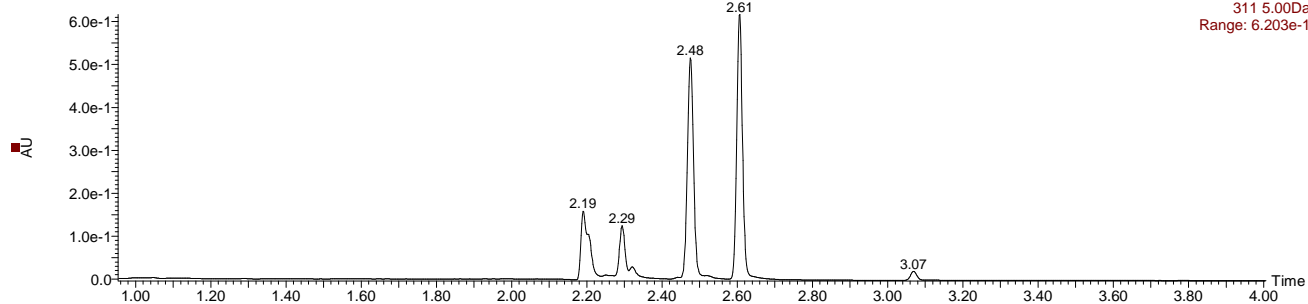

3: Diode Array  
311 5.00Da  
Range: 6.203e-1

**Supplementary Figure 1A.** HPLC analysis of PqsD activity. Upper panel, extracted ion chromatogram of DHQ ( $m/z = 162.055$ ; retention time, 2.63 min) identifies the peak at 2.62 minutes in the lower panel as DHQ.

0.15 E 10

DHQ37b-5 325 (2.744) Cm (325:330)

1: TOF MS ES+  
3.41e3

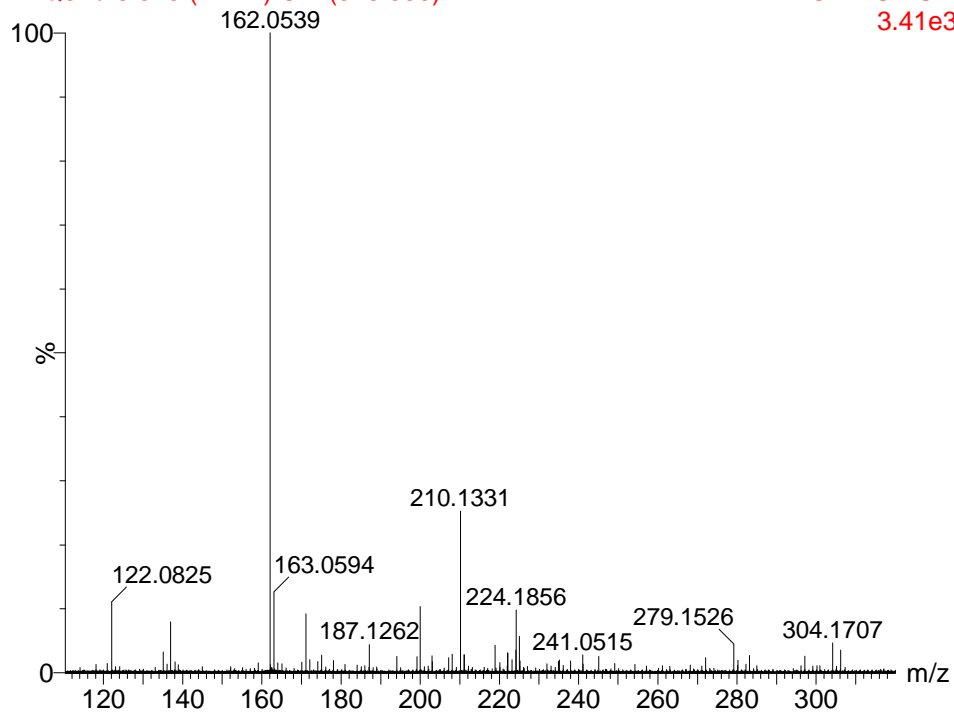

**Supplementary Figure 1B.** Electrospray ionization mass spectrum of the material eluting at 2.62 min in *Supplementary Figure 1B* above confirms that it is DHQ ( $m/z_{obsd} = 162.0539$ ;  $m/z_{calcd} = 162.0555$ ).

0.15 E 10

DHQ37b-5 1565 (2.607) Cm (1561:1577)

3: Diode Array  
1.455e-1

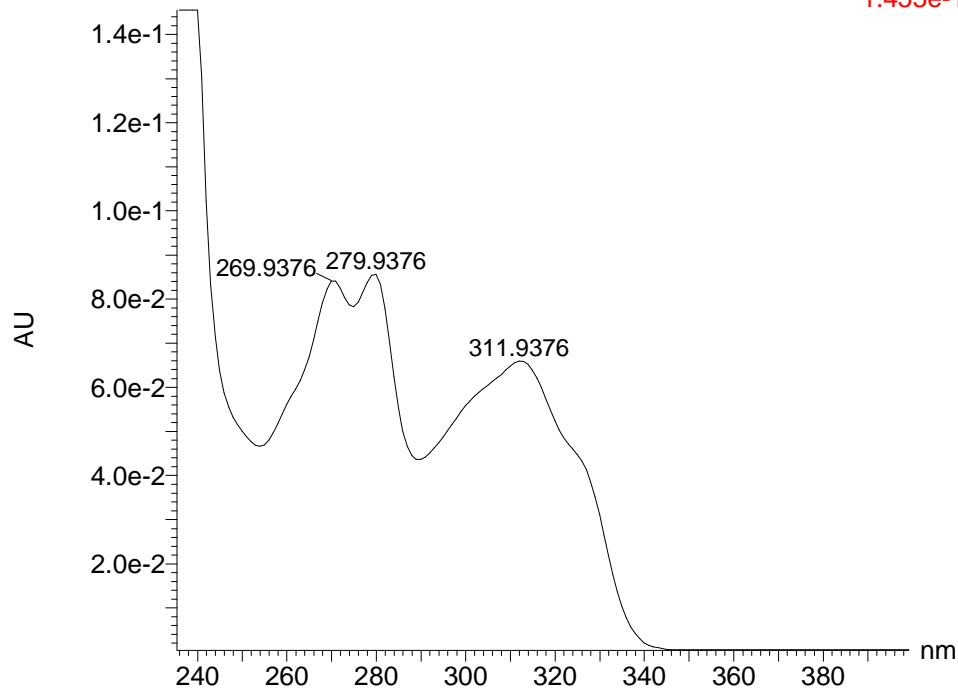

**Supplementary Figure 1C.** UV spectrum of the material eluting at 2.62 min in *Supplementary Figure 1B* above is consistent with the UV spectrum of authentic DHQ.

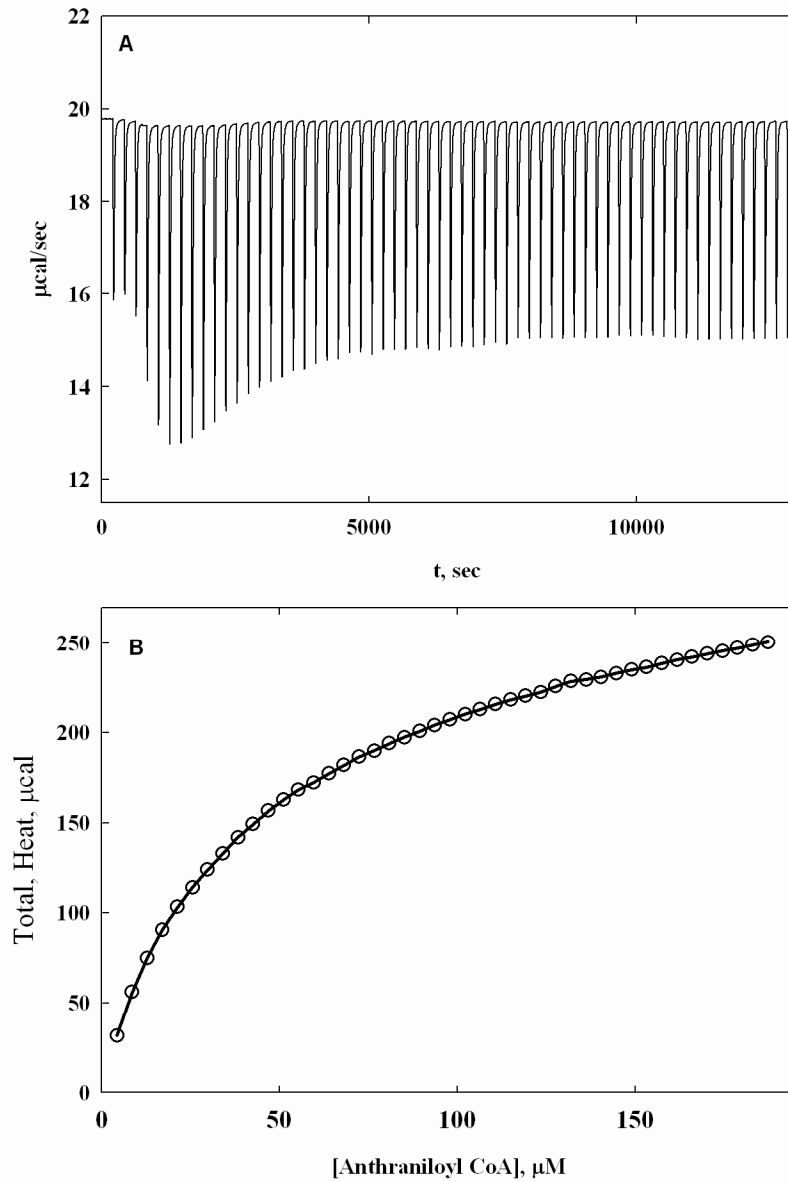

**Supplementary Figure 2.** Analysis of the interaction between Cys112Ala PqsD and ACoA by isothermal titration calorimetry. (A) Raw ITC data. A considerable heat of dilution is apparent and was noted in similar injections into buffer only. (B) Data were analyzed by plotting total heat evolved vs [ACoA] and fitting to the following hyperbolic function where  $y$  is cumulative heat evolved,  $y_0$  is an offset term for a nonzero baseline,  $a$

is the amplitude of the curve, and  $b$  is the apparent  $k_d$ . The first four injections were excluded from the fit due to noise.

$$y = y_0 + \frac{ax}{b+x} \quad (\text{Supplementary Equation 1})$$
